# Supplementary material for: Estimating Prevalence and Characteristics of Statin Intolerance among High and Very High Cardiovascular Risk Patients in Germany (2017 to 2020)
Source: MDPI journal article supplement (doi:10.3390/jcm12020705), 2023-01-16
Supplement: s1 [file s1]

## Supplementary Materials

**Table S1.** Definition of LLTs, hypercholesterolemia, ASCVD, and high CV risk.

| Segment                                                                                                                                           | Definitions                                                                                                                                                                                                                                                                                                                                                                                                                                                                                                           |
|---------------------------------------------------------------------------------------------------------------------------------------------------|-----------------------------------------------------------------------------------------------------------------------------------------------------------------------------------------------------------------------------------------------------------------------------------------------------------------------------------------------------------------------------------------------------------------------------------------------------------------------------------------------------------------------|
| Lipid-lowering therapies (LLTs)                                                                                                                   | <p>Defined based on Anatomical Therapeutic Chemical (ATC) classes:</p> <ul style="list-style-type: none"> <li>• C10A (cholesterol- and triglyceride-regulating preparations)</li> <li>• C10C (lipid-regulators in combination with other lipid-regulators)</li> <li>• C11A (lipid-regulating cardiovascular multitherapy combination products)</li> </ul>                                                                                                                                                             |
| Hypercholesterolemia                                                                                                                              | <p>Defined by a confirmed diagnosis based on ICD-10 codes:</p> <ul style="list-style-type: none"> <li>• E78.0 (pure hypercholesterolemia)</li> <li>• E78.2 (mixed hyperlipidemia)</li> <li>• E78.4 (other hyperlipidemias)</li> <li>• E78.5 (hyperlipidemia, unspecified)</li> <li>• E78.9 (disorder of lipoprotein metabolism unspecified)</li> <li>• E78.8 (other disorders of lipoprotein metabolism)</li> </ul>                                                                                                   |
| Atherosclerotic cardiovascular disease (ASCVD)                                                                                                    | <p>Defined by a confirmed diagnosis based on ICD-10 codes:</p> <ul style="list-style-type: none"> <li>• I20–I25 (coronary heart disease and coronary artery disease)</li> <li>• I63, I64, G45 cerebrovascular disease</li> <li>• I70–I74 atherosclerosis, aortic aneurysm, and peripheral vascular disease</li> <li>• Z955 presence of coronary angioplasty implant and graft</li> <li>• Z951 presence of aortocoronary bypass graft (presence of aortocoronary bypass graft)</li> </ul>                              |
| High CV risk                                                                                                                                      | <p>Was defined by a confirmed diagnosis of any of the ICD-10 codes and conditions below:</p> <ul style="list-style-type: none"> <li>• E10 (type 1 diabetes) or E11 (type 2 diabetes), female aged &gt;65 years, male aged &gt;60 years</li> <li>• LDL-cholesterol value &gt;190 mg/dL or total cholesterol value &gt;310 mg/dL</li> <li>• N18.3, N18.4, N18.5 moderate-to-severe chronic kidney disease</li> </ul> <p><i>Note: blood pressure values and smoking status were not used to define high CV risk.</i></p> |
| ICD, International Classification of Diseases; ASCVD, atherosclerotic cardiovascular disease; CV, cardiovascular; LLTs, lipid-lowering therapies. |                                                                                                                                                                                                                                                                                                                                                                                                                                                                                                                       |

**Table S2.** Definition of statin intolerance (SI) events.

| Event/s                                                         | Definition                                                                                                                                                                                                                                                                                                                                                                                                                                                                                                                  |
|-----------------------------------------------------------------|-----------------------------------------------------------------------------------------------------------------------------------------------------------------------------------------------------------------------------------------------------------------------------------------------------------------------------------------------------------------------------------------------------------------------------------------------------------------------------------------------------------------------------|
| Statin down-titration (same molecule)                           | A reduction in strength of consecutive statin prescriptions if the same molecule.                                                                                                                                                                                                                                                                                                                                                                                                                                           |
| Statin down-titration (different molecule)                      | A reduction in dosage intensity (based on Table S4), for consecutive statin prescriptions.                                                                                                                                                                                                                                                                                                                                                                                                                                  |
| Statin switch/multiple statins (without up- or down- titration) | A switch of molecule for consecutive statin prescriptions, if the same dosage intensity (based on Table S4).                                                                                                                                                                                                                                                                                                                                                                                                                |
| Statin discontinuation                                          | No statin prescriptions for more than 180 days over the median treatment length for given pack.                                                                                                                                                                                                                                                                                                                                                                                                                             |
| Intermittent dosing                                             | No statin prescriptions for over twice the median treatment length of pack.                                                                                                                                                                                                                                                                                                                                                                                                                                                 |
| Low-dose statin use                                             | Low-dose statin therapy was defined as an average daily dose of rosuvastatin 5 mg or lower, atorvastatin 10 mg or lower, simvastatin 10 mg or lower, lovastatin 20 mg or lower, pravastatin 40 mg or lower, fluvastatin 40 mg or lower, or pitavastatin 2 mg or lower.                                                                                                                                                                                                                                                      |
| Documented SI/toxicity/allergy                                  | <p>ICD codes:</p> <ul style="list-style-type: none"> <li>• T466 (poisoning by antihyperlipidemic and anti-arteriosclerosis drugs)</li> <li>• Y526 (adverse effects in therapeutic use: antihyperlipidemic and ant arteriosclerotic drugs)</li> <li>• T887 (unspecified undesirable side effect of a medicine or drug)</li> </ul>                                                                                                                                                                                            |
| Presence of SAMS                                                | <p>SAMS-related ICD codes:</p> <ul style="list-style-type: none"> <li>• M628 (rhabdomyolysis)</li> <li>• M608 (other myositis) <ul style="list-style-type: none"> <li>• M791 (myalgia)</li> <li>• M609 (myositis)</li> </ul> </li> <li>• G720 (drug-induced myopathy)</li> <li>• G728 (other specified myopathies)</li> <li>• G722 (myopathy caused by other toxic agents) <ul style="list-style-type: none"> <li>• G729 (myopathy, unspecified)</li> </ul> </li> <li>• R25.2 (cramps and spasms of the muscles)</li> </ul> |

ICD, International Classification of Diseases; SI, statin intolerance; SAMS, statin-associated muscle symptoms.

**Table S3.** Definition of lipid-lowering therapies (LLTs).

| WHO-ATC | Substance                | Group                   |
|---------|--------------------------|-------------------------|
| C10AA01 | Simvastatin              | Statins                 |
| C10AA02 | Lovastatin               |                         |
| C10AA03 | Pravastatin              |                         |
| C10AA04 | Fluvastatin              |                         |
| C10AA05 | Atorvastatin             |                         |
| C10AA07 | Rosuvastatin             |                         |
| C10AA08 | Pitavastatin             |                         |
| C10AX09 | Ezetimibe                | Ezetimibe               |
| C10BA02 | Simvastatin + ezetimibe  | Statins + Ezetimibe FDC |
| C10BA05 | Atorvastatin + ezetimibe |                         |
| C10BA06 | Rosuvastatin + ezetimibe |                         |
| C10AX13 | Evolocumab               | PCSK9 inhibitors        |
| C10AX14 | Alirocumab               |                         |
| C10AX16 | Inclisiran               |                         |

FDC, fixed dose combination; PCSK9, proprotein convertase subtilisin/kexin type 9; WHO-ATC, World Health Organization Anatomical Therapeutic Chemical code.

**Table S4.** Definition of lipid-lowering therapies (LLTs).

| Substance    | Low-intensity<br>(LDL-C reduction <30%) | Moderate-intensity<br>(LDL-C reduction 30% to <50%) | High-intensity<br>(LDL-C reduction >50%) |
|--------------|-----------------------------------------|-----------------------------------------------------|------------------------------------------|
| Atorvastatin | -                                       | <30 mg                                              | ≥30 mg                                   |
| Fluvastatin  | <60 mg                                  | ≥60 mg                                              | -                                        |
| Lovastatin   | <30 mg                                  | ≥30 mg                                              | -                                        |
| Pitavastatin | <1.5 mg                                 | ≥1.5 mg                                             | -                                        |
| Pravastatin  | <30 mg                                  | ≥30 mg                                              | -                                        |
| Rosuvastatin | -                                       | <15 mg                                              | ≥15 mg                                   |
| Simvastatin  | <15 mg                                  | 15–60 mg                                            | ≥60 mg                                   |

LDL-C, low-density lipoprotein cholesterol.

The classification of statin intensity is based on Fox et al. 2017 (Table S1) [36], which was used to identify up- and down-titration events only.

Eligible patients were classified into three key cohorts for analysis of SI (Table S5):

- Cohort A: Patients not taking lipid-lowering medications during the selection period (March 2019 to March 2020), but who had previously taken statins (March 2017 to March 2019).
- Cohort B: Patients with ASCVD and high CV risk who were only on non-statin lipid-lowering medications during the selection period.
- Cohort C: Patients on ≥1 statins during the selection period (March 2019 to March 2020).

**Table S5.** Absolute statin intolerance – SI rules and cohort segments by level of confidence.

| Confidence      | Cohort | Segment                                                                                                                                 | Rule                                                                                                                                                                                                                                                                  |
|-----------------|--------|-----------------------------------------------------------------------------------------------------------------------------------------|-----------------------------------------------------------------------------------------------------------------------------------------------------------------------------------------------------------------------------------------------------------------------|
| <b>High</b>     | B      | All patients                                                                                                                            | Patients <b>ONLY ON</b> non-statins                                                                                                                                                                                                                                   |
|                 | A      | All patients                                                                                                                            | Long-term discontinuation <b>AND</b> down-titration (different molecule) or switch from atorvastatin/simvastatin to rosuvastatin 5 mg/pravastatin/fluvastatin                                                                                                         |
|                 | A      | <ul style="list-style-type: none"> <li>• ASCVD/High CV risk</li> <li>• Low-intensity statin as latest prescription</li> </ul>           | Long-term discontinuation <b>AND</b> low-dose statin as the latest prescription                                                                                                                                                                                       |
|                 | A      | <ul style="list-style-type: none"> <li>• ASCVD/High CV risk</li> <li>• <b>No</b> low-intensity statin latest prescription</li> </ul>    | Long-term discontinuation <b>AND</b> history of any SI event, including documented SI in notes or statin down-titration (same or different molecule) or statin switch or SAMS or intermittent dosing                                                                  |
|                 | A      | <b>No</b> ASCVD/High CV risk patients                                                                                                   | Long-term discontinuation <b>AND</b> history of any SI event, including documented SI in notes or statin down-titration (same or different molecule) or statin switch or SAMS or intermittent dosing                                                                  |
|                 | C      | <ul style="list-style-type: none"> <li>• ASCVD/High CV risk</li> <li>• Low-intensity statin as latest prescription</li> </ul>           | Patients with discontinuation for latest statins <b>AND</b> history of documented SI in notes <b>OR</b> statin down-titration (same or different molecule) <b>OR</b> statin switch                                                                                    |
| <b>Moderate</b> | A      | <ul style="list-style-type: none"> <li>• ASCVD/High CV risk</li> <li>• <b>No</b> low-intensity statin as latest prescription</li> </ul> | Long-term discontinuation <b>AND</b> <i>SI events limited to only</i> (SAMS <b>OR</b> intermittent dosing <b>OR</b> prior discontinuation)                                                                                                                            |
|                 | A      | <b>No</b> ASCVD/High CV risk                                                                                                            | Long-term discontinuation <b>AND</b> <i>SI events limited to only</i> (SAMS <b>OR</b> intermittent dosing <b>OR</b> prior discontinuation)                                                                                                                            |
|                 | C      | <ul style="list-style-type: none"> <li>• ASCVD/High CV risk</li> <li>• <b>No</b> low-intensity statin as latest prescription</li> </ul> | Patients with discontinuation for latest statins <b>AND</b> history of documented SI in notes <b>OR</b> statin down-titration (same or different molecule) <b>OR</b> statin switch                                                                                    |
|                 | C      | <b>No</b> ASCVD/High CV risk                                                                                                            | Patients with discontinuation for latest statins <b>AND</b> history of documented SI in notes <b>OR</b> statin down-titration (same or different molecule) <b>OR</b> statin switch                                                                                    |
| <b>Low</b>      | A      | <b>No</b> ASCVD/High CV risk patients                                                                                                   | Long-term discontinuation <b>AND WITHOUT ANY</b> history of any SI event, including documented SI in notes <b>OR</b> statin down-titration (same or different molecule) <b>OR</b> statin switch or SAMS <b>OR</b> intermittent dosing <b>OR</b> prior discontinuation |
|                 | A      | <ul style="list-style-type: none"> <li>• ASCVD/High CV risk</li> <li>• <b>No</b> low-intensity statin as latest prescription</li> </ul> | Long-term discontinuation <b>AND WITHOUT ANY</b> history of any SI event, including documented SI in notes <b>OR</b> statin down-titration (same or different molecule) <b>OR</b> statin switch or SAMS <b>OR</b> intermittent dosing <b>OR</b> prior discontinuation |

ASCVD, atherosclerotic cardiovascular disease; CV, cardiovascular; SAMS, statin-associated muscle symptoms; SI, statin intolerance.

**Table S6.** Partial statin intolerance – SI rules and cohort segments by level of confidence.

| Confidence | Cohort | Segment                                                                                                                              | Rule                                                                                                                                                                                                                                                                       |
|------------|--------|--------------------------------------------------------------------------------------------------------------------------------------|----------------------------------------------------------------------------------------------------------------------------------------------------------------------------------------------------------------------------------------------------------------------------|
| High       | C      | All patients                                                                                                                         | Patients <b>WITHOUT</b> discontinuation for latest statins <b>AND</b> with down-titration (different molecule) or switch from atorvastatin/simvastatin to rosuvastatin 5 mg/pravastatin/fluvastatin                                                                        |
|            | C      | <ul style="list-style-type: none"> <li>• ASCVD/High CV risk</li> <li>• Low-intensity statin as latest prescription</li> </ul>        | Patients <b>WITHOUT</b> discontinuation for latest statins <b>AND WITH</b> history of documented SI in notes <b>OR</b> statin down-titration (same or different molecule) <b>OR</b> statin switch                                                                          |
| Moderate   | C      | <ul style="list-style-type: none"> <li>• ASCVD/High CV risk</li> <li>• Low-intensity statin as latest prescription</li> </ul>        | Patients <b>WITHOUT</b> discontinuation for latest statins <b>AND SI events limited to only</b> (SAMS <b>OR</b> intermittent dosing <b>OR</b> prior discontinuation)                                                                                                       |
|            | C      | <ul style="list-style-type: none"> <li>• ASCVD/High CV risk</li> <li>• <b>No</b> low-intensity statin latest prescription</li> </ul> | Patients with only intermittent dosing of latest statins <b>AND</b> history of documented SI in notes <b>OR</b> statin down-titration (same or different molecule) <b>OR</b> statin switch                                                                                 |
|            | C      | <b>No</b> ASCVD/High CV risk                                                                                                         | Patients with only intermittent dosing of latest statins <b>AND</b> history of documented SI in notes <b>OR</b> statin down-titration (same or different molecule) <b>OR</b> statin switch                                                                                 |
| Low        | C      | <ul style="list-style-type: none"> <li>• ASCVD/High CV risk</li> <li>• Low-intensity statin as latest prescription</li> </ul>        | Low-intensity stain usage <b>AND WITHOUT ANY history of a SI event, including</b> documented SI in notes <b>OR</b> statin down-titration (same or different molecule) <b>OR</b> statin switch <b>OR</b> SAMS <b>OR</b> intermittent dosing <b>OR</b> prior discontinuation |
|            | C      | <ul style="list-style-type: none"> <li>• ASCVD/High CV risk</li> <li>• <b>No</b> low-intensity statin latest prescription</li> </ul> | Patients <b>WITHOUT ANY</b> intermittent dosing <b>OR</b> discontinuation of latest statins <b>WITH</b> history of documented SI in notes <b>OR</b> statin down-titration (same or different molecule) <b>OR</b> statin switch                                             |
|            | C      | <b>No</b> ASCVD/High CV risk                                                                                                         | Patients <b>WITHOUT ANY</b> intermittent dosing <b>OR</b> discontinuation of latest statins <b>AND WITH</b> history of documented SI in notes <b>OR</b> statin down-titration (same or different molecule) <b>OR</b> statin switch                                         |

ASCVD, atherosclerotic cardiovascular disease; CV, cardiovascular; SAMS, statin- associated muscle symptoms; SI, statin intolerance.

Table S7. Patient and treatment characteristics (age, gender, patient subgroups, and risk).

1

| Features                            | Statin<br>tolerant | Statin<br>intolerant | Absolute statin intolerant       |                                 | Partial statin intolerant       |                                 | Total              |
|-------------------------------------|--------------------|----------------------|----------------------------------|---------------------------------|---------------------------------|---------------------------------|--------------------|
|                                     | n = 221,442        | n = 71,161           | High<br>confidence<br>n = 18,652 | Low<br>confidence<br>n = 27,530 | High<br>confidence<br>n = 8,318 | Low<br>confidence<br>n = 16,661 | n = 292,603        |
| <b>Age</b>                          |                    |                      |                                  |                                 |                                 |                                 |                    |
| 18–30                               | 351 (0.2%)         | 200 (0.3%)           | 42 (0.2%)                        | 124 (0.5%)                      | 11 (0.1%)                       | 23 (0.1%)                       | 551 (0.2%)         |
| 30–50                               | 7,501 (3.4%)       | 3,353 (4.7%)         | 730 (3.9%)                       | 1,729 (6.3%)                    | 344 (4.1%)                      | 550 (3.3%)                      | 10,854 (3.7%)      |
| 50–70                               | 84,855<br>(38.3%)  | 28,573 (40.2%)       | 7,137 (38.3%)                    | 10,907 (39.6%)                  | 3,695<br>(44.4%)                | 6,834 (41.0%)                   | 113,428<br>(38.8%) |
| 70+                                 | 128,735<br>(58.1%) | 39,035 (54.9%)       | 10,743 (57.6%)                   | 14,770 (53.7%)                  | 4,268<br>(51.3%)                | 9,254 (55.5%)                   | 167,770<br>(57.3%) |
| <b>Gender</b>                       |                    |                      |                                  |                                 |                                 |                                 |                    |
| Female                              | 95,743<br>(43.2%)  | 33,591 (47.2%)       | 8,963 (48.1%)                    | 13,876 (50.4%)                  | 3,574<br>(43.0%)                | 7,178 (43.1%)                   | 129,334<br>(44.2%) |
| Male                                | 125,302<br>(56.6%) | 37,399 (52.6%)       | 9,653 (51.8%)                    | 13,587 (49.4%)                  | 4,724<br>(56.8%)                | 9,435 (56.6%)                   | 162,701<br>(55.6%) |
| Unspecified                         | 397 (0.2%)         | 171 (0.2%)           | 36 (0.2%)                        | 67 (0.2%)                       | 20 (0.2%)                       | 48 (0.3%)                       | 568 (0.2%)         |
| ASCVD                               | 124,937<br>(56.4%) | 40,023 (56.2%)       | 10,089 (54.1%)                   | 13,405 (48.7%)                  | 5,688<br>(68.4%)                | 10,841 (65.1%)                  | 164,960<br>(56.4%) |
| High CV risk                        | 43,918<br>(19.8%)  | 17,224 (24.2%)       | 5,367 (28.8%)                    | 7,076 (25.7%)                   | 1,541<br>(18.5%)                | 3,240 (19.4%)                   | 61,142<br>(20.9%)  |
| Hypercholesterolemia                | 52,587<br>(23.7%)  | 13,914 (19.6%)       | 3,196 (17.1%)                    | 7,049 (25.6%)                   | 1,089<br>(13.1%)                | 2,580 (15.5%)                   | 66,501<br>(22.7%)  |
| <b>Risk factors</b>                 |                    |                      |                                  |                                 |                                 |                                 |                    |
| Obesity                             | 20,877 (9.4%)      | 6,820 (9.6%)         | 1,701 (9.1%)                     | 2,583 (9.4%)                    | 813 (9.8%)                      | 1,723 (10.3%)                   | 27,697 (9.5%)      |
| Frailty and senility                | 8,802 (4.0%)       | 2,673 (3.8%)         | 751 (4.0%)                       | 1,019 (3.7%)                    | 236 (2.8%)                      | 667 (4.0%)                      | 11,475 (3.9%)      |
| Cachexia                            | 904 (0.4%)         | 441 (0.6%)           | 123 (0.7%)                       | 231 (0.8%)                      | 27 (0.3%)                       | 60 (0.4%)                       | 1,345 (0.5%)       |
| Vitamin D deficiency                | 38,092<br>(17.2%)  | 14,575 (20.5%)       | 3,935 (21.1%)                    | 5,233 (19.0%)                   | 1,766<br>(21.2%)                | 3,641 (21.9%)                   | 52,667<br>(18.0%)  |
| Alcohol-abuse-related conditions    | 3,330 (1.5%)       | 1,094 (1.5%)         | 275 (1.5%)                       | 491 (1.8%)                      | 88 (1.1%)                       | 240 (1.4%)                      | 4,424 (1.5%)       |
| Alcohol dependence, psychosis, etc. | 2,859 (1.3%)       | 936 (1.3%)           | 233 (1.2%)                       | 435 (1.6%)                      | 64 (0.8%)                       | 204 (1.2%)                      | 3,795 (1.3%)       |
| Polyneuropathy                      | 181 (0.1%)         | 57 (0.1%)            | 14 (0.1%)                        | 27 (0.1%)                       | 5 (0.1%)                        | 11 (0.1%)                       | 238 (0.1%)         |

| Features                                           | Statin<br>tolerant | Statin<br>intolerant | Absolute statin intolerant |                   | Partial statin intolerant |                   | Total              |
|----------------------------------------------------|--------------------|----------------------|----------------------------|-------------------|---------------------------|-------------------|--------------------|
|                                                    |                    |                      | High<br>confidence         | Low<br>confidence | High<br>confidence        | Low<br>confidence |                    |
|                                                    | n = 221,442        | n = 71,161           | n = 18,652                 | n = 27,530        | n = 8,318                 | n = 16,661        | n = 292,603        |
| Myopathy                                           | 0 (0%)             | 0 (0%)               | 0 (0%)                     | 0 (0%)            | 0 (0%)                    | 0 (0%)            | 0 (0%)             |
| Pancreatitis                                       | 123 (0.1%)         | 45 (0.1%)            | 14 (0.1%)                  | 21 (0.1%)         | 4 (0%)                    | 6 (0%)            | 168 (0.1%)         |
| Liver disease                                      | 484 (0.2%)         | 150 (0.2%)           | 43 (0.2%)                  | 54 (0.2%)         | 18 (0.2%)                 | 35 (0.2%)         | 634 (0.2%)         |
| Hypothyroidism                                     | 19,512 (8.8%)      | 6,571 (9.2%)         | 1,697 (9.1%)               | 2,486 (9.0%)      | 792 (9.5%)                | 1,596 (9.6%)      | 26,083 (8.9%)      |
| Liver disease                                      | 2,336 (1.1%)       | 871 (1.2%)           | 264 (1.4%)                 | 326 (1.2%)        | 88 (1.1%)                 | 193 (1.2%)        | 3,207 (1.1%)       |
| CKD                                                | 10,102 (4.6%)      | 3,593 (5.0%)         | 993 (5.3%)                 | 1,394 (5.1%)      | 376 (4.5%)                | 830 (5.0%)        | 13,695 (4.7%)      |
| <b>Treatment usage</b>                             |                    |                      |                            |                   |                           |                   |                    |
| <b>Statins</b>                                     |                    |                      |                            |                   |                           |                   |                    |
| Total                                              | 204,612<br>(92.4%) | 63,328 (89.0%)       | 14,287 (76.6%)             | 26,401 (95.9%)    | 7,495<br>(90.1%)          | 15,145 (90.9%)    | 267,940<br>(91.6%) |
| Simvastatin                                        | 109,835<br>(49.6%) | 28,390 (39.9%)       | 7,535 (40.4%)              | 12,719 (46.2%)    | 2,287<br>(27.5%)          | 5,848 (35.1%)     | 138,225<br>(47.2%) |
| Atorvastatin                                       | 81,712<br>(36.9%)  | 26,011 (36.6%)       | 5,521 (29.6%)              | 12,141 (44.1%)    | 4,068<br>(48.9%)          | 4,282 (25.7%)     | 107,723<br>(36.8%) |
| Rosuvastatin                                       | 5,757 (2.6%)       | 1,284 (1.8%)         | 37 (0.2%)                  | 606 (2.2%)        | 208 (2.5%)                | 433 (2.6%)        | 7,041 (2.4%)       |
| Others                                             | 7,308 (3.3%)       | 7,643 (10.7%)        | 1,194 (6.4%)               | 936 (3.4%)        | 932<br>(11.2%)            | 4,582 (27.5%)     | 14,951 (5.1%)      |
| <b>Non-statins</b>                                 |                    |                      |                            |                   |                           |                   |                    |
| Total                                              | 24,170<br>(10.9%)  | 16,924 (23.8%)       | 6,157 (33.0%)              | 1,540 (5.6%)      | 4,523<br>(54.4%)          | 4,820 (28.9%)     | 41,094<br>(14.0%)  |
| Ezetimibe (Mono or in combination<br>with statins) | 21,291 (9.6%)      | 14,743 (20.7%)       | 4,031 (21.6%)              | 1,402 (5.1%)      | 4,490<br>(54.0%)          | 4820 (28.9%)      | 36,034<br>(12.3%)  |
| Fenofibrate                                        | 1,329 (0.6%)       | 933 (1.4%)           | 933 (5.0%)                 | 0 (0%)            | 0 (0%)                    | 0 (0%)            | 2262 (0.8%)        |
| Bezafibrate                                        | 1,107 (0.5%)       | 801 (1.2%)           | 746 (4.0%)                 | 55 (0.2%)         | 0 (0%)                    | 0 (0%)            | 1,908 (0.7%)       |
| Others                                             | 443 (0.2%)         | 447 (0.7%)           | 448 (2.4%)                 | 83 (0.3%)         | 33 (0.4%)                 | 0 (0%)            | 890 (0.3%)         |
| <b>SAMS</b>                                        |                    |                      |                            |                   |                           |                   |                    |
| Total*                                             | 11,290 (5.1%)      | 4,902 (6.9%)         | 1,894 (10.2%)              | 1,067 (3.9%)      | 815 (9.8%)                | 1,126 (6.8%)      | 16,192 (5.5%)      |
| Rhabdomyolysis                                     | 21 (0%)            | 13 (0%)              | 8 (0%)                     | 4 (0%)            | 0 (0%)                    | 1 (0%)            | 34 (0%)            |



| Features                                  | Statin<br>tolerant | Statin<br>intolerant | Absolute statin intolerant |                   | Partial statin intolerant |                   | Total             |
|-------------------------------------------|--------------------|----------------------|----------------------------|-------------------|---------------------------|-------------------|-------------------|
|                                           |                    |                      | High<br>confidence         | Low<br>confidence | High<br>confidence        | Low<br>confidence |                   |
|                                           | n = 221,442        | n = 71,161           | n = 18,652                 | n = 27,530        | n = 8,318                 | n = 16,661        | n = 292,603       |
| Other myositis                            | 10 (0%)            | 9 (0%)               | 3 (0%)                     | 4 (0%)            | 0 (0%)                    | 2 (0%)            | 19 (0%)           |
| Myalgia                                   | 4,240 (1.9%)       | 1,882 (2.6%)         | 800 (4.3%)                 | 356 (1.3%)        | 330 (4.0%)                | 396 (2.4%)        | 6,122 (2.1%)      |
| Myositis                                  | 76 (0%)            | 60 (0.1%)            | 31 (0.2%)                  | 8 (0%)            | 9 (0.1%)                  | 12 (0.1%)         | 136 (0%)          |
| Drug-induced myopathy                     | 16 (0%)            | 23 (0%)              | 15 (0.1%)                  | 1 (0%)            | 3 (0%)                    | 4 (0%)            | 39 (0%)           |
| Other specified myopathies                | 50 (0%)            | 18 (0%)              | 8 (0%)                     | 3 (0%)            | 2 (0%)                    | 5 (0%)            | 68 (0%)           |
| Myopathy due to other toxic agents        | 2 (0%)             | 2 (0%)               | 1 (0%)                     | 0 (0%)            | 0 (0%)                    | 1 (0%)            | 4 (0%)            |
| Myopathy, unspecified                     | 165 (0.1%)         | 130 (0.2%)           | 62 (0.3%)                  | 18 (0.1%)         | 22 (0.3%)                 | 28 (0.2%)         | 295 (0.1%)        |
| Rheumatism, unspecified                   | 2,543 (1.1%)       | 1,243 (1.7%)         | 336 (1.8%)                 | 389 (1.4%)        | 193 (2.3%)                | 325 (2.0%)        | 3,786 (1.3%)      |
| Cramps/spasms of the muscles              | 4,808 (2.2%)       | 1,864 (2.6%)         | 769 (4.1%)                 | 330 (1.2%)        | 326 (3.9%)                | 439 (2.6%)        | 6,672 (2.3%)      |
| <b>Other adverse events</b>               |                    |                      |                            |                   |                           |                   |                   |
| Total*                                    | 64,606<br>(29.2%)  | 23,096 (32.5%)       | 6,207 (33.3%)              | 8,797 (32.0%)     | 2,731<br>(32.8%)          | 5,361 (32.2%)     | 87,702<br>(30.0%) |
| Arthralgia                                | 811 (0.4%)         | 269 (0.4%)           | 81 (0.4%)                  | 95 (0.3%)         | 34 (0.4%)                 | 59 (0.4%)         | 1,080 (0.4%)      |
| Constipation                              | 12,121 (5.5%)      | 4,408 (6.2%)         | 1,224 (6.6%)               | 1,869 (6.8%)      | 427 (5.1%)                | 888 (5.3%)        | 16,529 (5.6%)     |
| Diarrhea                                  | 293 (0.1%)         | 119 (0.2%)           | 41 (0.2%)                  | 45 (0.2%)         | 7 (0.1%)                  | 26 (0.2%)         | 412 (0.1%)        |
| Abdominal pain                            | 11,906 (5.4%)      | 4,750 (6.7%)         | 1,288 (6.9%)               | 1,773 (6.4%)      | 567 (6.8%)                | 1,122 (6.7%)      | 16,656 (5.7%)     |
| Flatulence                                | 4,181 (1.9%)       | 1,727 (2.4%)         | 511 (2.7%)                 | 613 (2.2%)        | 197 (2.4%)                | 406 (2.4%)        | 5,908 (2.0%)      |
| Nausea and vomiting                       | 8,261 (3.7%)       | 3,450 (4.8%)         | 944 (5.1%)                 | 1,422 (5.2%)      | 376 (4.5%)                | 708 (4.2%)        | 11,711 (4.0%)     |
| Gastritis & duodenitis                    | 30,214<br>(13.6%)  | 10,731 (15.1%)       | 2,863 (15.3%)              | 3,976 (14.4%)     | 1,328<br>(16.0%)          | 2,564 (15.4%)     | 40,945<br>(14.0%) |
| Anaphylaxis                               | 5,840 (2.6%)       | 2,344 (3.3%)         | 608 (3.3%)                 | 896 (3.3%)        | 299 (3.6%)                | 541 (3.2%)        | 8,184 (2.8%)      |
| Rash and flushing                         | 9,108 (4.1%)       | 3,397 (4.8%)         | 922 (4.9%)                 | 1,293 (4.7%)      | 399 (4.8%)                | 783 (4.7%)        | 12,505 (4.3%)     |
| Cognitive impairment                      | 4,001 (1.8%)       | 1,323 (1.9%)         | 357 (1.9%)                 | 509 (1.8%)        | 129 (1.6%)                | 328 (2%)          | 5,324 (1.8%)      |
| <b>Drug-Drug</b>                          |                    |                      |                            |                   |                           |                   |                   |
| Itraconazole, posaconazole,<br>miconazole | 1,342 (0.6%)       | 522 (0.7%)           | 163 (0.9%)                 | 177 (0.6%)        | 62 (0.7%)                 | 120 (0.7%)        | 1,864 (0.6%)      |

| Features                                                                                             | Statin<br>tolerant | Statin<br>intolerant | Absolute statin intolerant       |                                 | Partial statin intolerant       |                                 | Total         |
|------------------------------------------------------------------------------------------------------|--------------------|----------------------|----------------------------------|---------------------------------|---------------------------------|---------------------------------|---------------|
|                                                                                                      | n = 221,442        | n = 71,161           | High<br>confidence<br>n = 18,652 | Low<br>confidence<br>n = 27,530 | High<br>confidence<br>n = 8,318 | Low<br>confidence<br>n = 16,661 | n = 292,603   |
| Erythromycin, telithromycin,<br>clarithromycin                                                       | 9,833 (4.4%)       | 3,615 (5.1%)         | 1,027 (5.5%)                     | 1,425 (5.2%)                    | 392 (4.7%)                      | 771 (4.6%)                      | 13,448 (4.6%) |
| Amprenavir, atazanavir,<br>fosamprenavir, indinavir, lopinavir,<br>nelfinavir, ritonavir, tipranavir | 8 (0%)             | 10 (0%)              | 4 (0%)                           | 2 (0%)                          | 1 (0%)                          | 3 (0%)                          | 18 (0%)       |
| Gemfibrozil                                                                                          | 57 (0%)            | 67 (0.1%)            | 42 (0.2%)                        | 10 (0%)                         | 6 (0.1%)                        | 9 (0.1%)                        | 124 (0%)      |
| Verapamil, diltiazem                                                                                 | 3,649 (1.6%)       | 1,353 (1.9%)         | 381 (2.0%)                       | 484 (1.8%)                      | 156 (1.9%)                      | 332 (2.0%)                      | 5,002 (1.7%)  |
| Warfarin                                                                                             | 212 (0.1%)         | 66 (0.1%)            | 21 (0.1%)                        | 27 (0.1%)                       | 4 (0%)                          | 14 (0.1%)                       | 278 (0.1%)    |
| Amiodarone                                                                                           | 4,557 (2.1%)       | 1,596 (2.2%)         | 382 (2.0%)                       | 550 (2.0%)                      | 215 (2.6%)                      | 449 (2.7%)                      | 6,153 (2.1%)  |

ASCVD, atherosclerotic cardiovascular disease; CKD, chronic kidney disease; CV, cardiovascular; EMR, electronic medical record; ML, machine learning.

**Table S8.** Statin intolerance prevalence estimates based on EMR data (by risk factors).

| Prevalence estimates           | Total universe    | Statin tolerant    |                    |                   |                      | Statin intolerant |                   |                   |                      |
|--------------------------------|-------------------|--------------------|--------------------|-------------------|----------------------|-------------------|-------------------|-------------------|----------------------|
|                                |                   |                    |                    |                   |                      | by risk factor    |                   |                   |                      |
|                                |                   | Total              | ASCVD              | High CV risk      | Hypercholesterolemia | Total             | ASCVD             | High CV risk      | Hypercholesterolemia |
| SI rules (EMR)                 | 292,603<br>(100%) | 224,112<br>(76.6%) | 124,938<br>(55.7%) | 43,918<br>(19.6%) | 52,587<br>(23.5%)    | 71,161<br>(24.3%) | 40,023<br>(56.2%) | 17,224<br>(24.2%) | 13,914<br>(19.6%)    |
| SI rules + supervised ML (EMR) |                   |                    |                    |                   |                      |                   |                   |                   |                      |

ASCVD, atherosclerotic cardiovascular disease; CKD, chronic kidney disease; CV, cardiovascular; EMR, electronic medical record; ML, machine learning.
